# Supplementary material for: Thermal and electrical laser tuning in liquid crystal blue phase I
Source: Royal Society of Chemistry journal article supplement (doi:10.1039/c2sm25197c), 2012-01-01

Electronic Supplementary Material (ESI)  
for Soft Matter  
This journal is © The Royal Society of  
Chemistry 2012

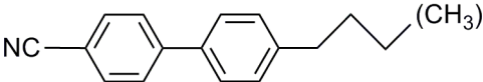

Supplement: c2sm25197c_3.pdf [file c2sm25197c_3.pdf]
