# Supplementary figures and images for: Thermal and electrical laser tuning in liquid crystal blue phase I
Source: Royal Society of Chemistry journal article supplement (doi:10.1039/c2sm25197c), 2012-01-01

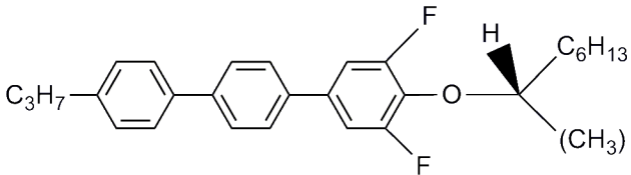

Supplement: c2sm25197c_2.pdf [file c2sm25197c_2.pdf]
